# Supplementary material for: Mucosal Immunization Has Benefits over Traditional Subcutaneous Immunization with Group A Streptococcus Antigens in a Pilot Study in a Mouse Model
Source: MDPI journal article supplement (doi:10.3390/vaccines11111724), 2023-11-17
Supplement: s1 [file s1]

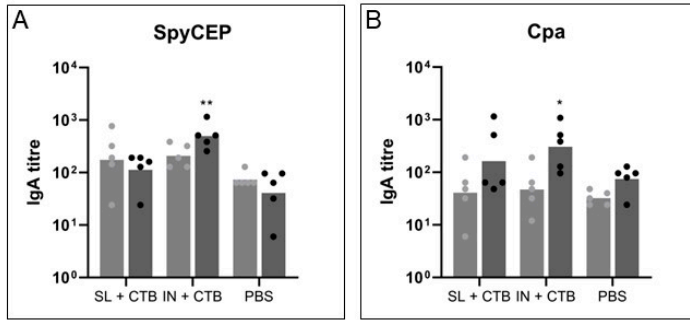

**Supplementary Figure S1: Mucosal IgA response to vaccine antigens between D21 and D36**

A distal IgA response was tested for SpyCEP (**A**) and Cpa (**B**) from Day 21 (light grey) and terminal (D36) faecal samples (dark grey) for individual mice for sublingual (SL), intranasal (IN) and PBS control (IN) with adjuvant. Kruskal-Wallis ANOVA was performed to compare groups with the PBS control. \*  $p < 0.05$ ; \*\*  $p < 0.01$ .

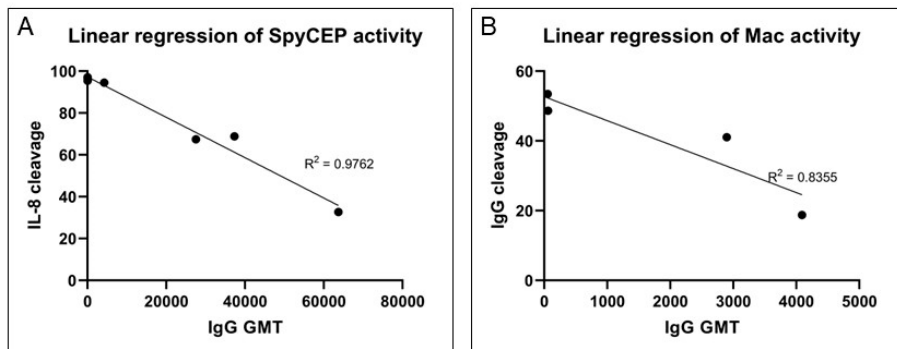

**Supplementary Figure S2: SpyCEP and Mac neutralisation activity correlates with antibody geometric mean titre**

Linear regression curves were plotted with cleavage activity against geometric mean titre of serum IgG. SpyCEP (**A**) were calculated from neat dilutions and Mac (**B**) from 1:10 dilutions.
